# Supplementary material
Source: publisher figshare collection journal article supplement (https://gsajournals.figshare.com/articles/dataset/_/12497855)

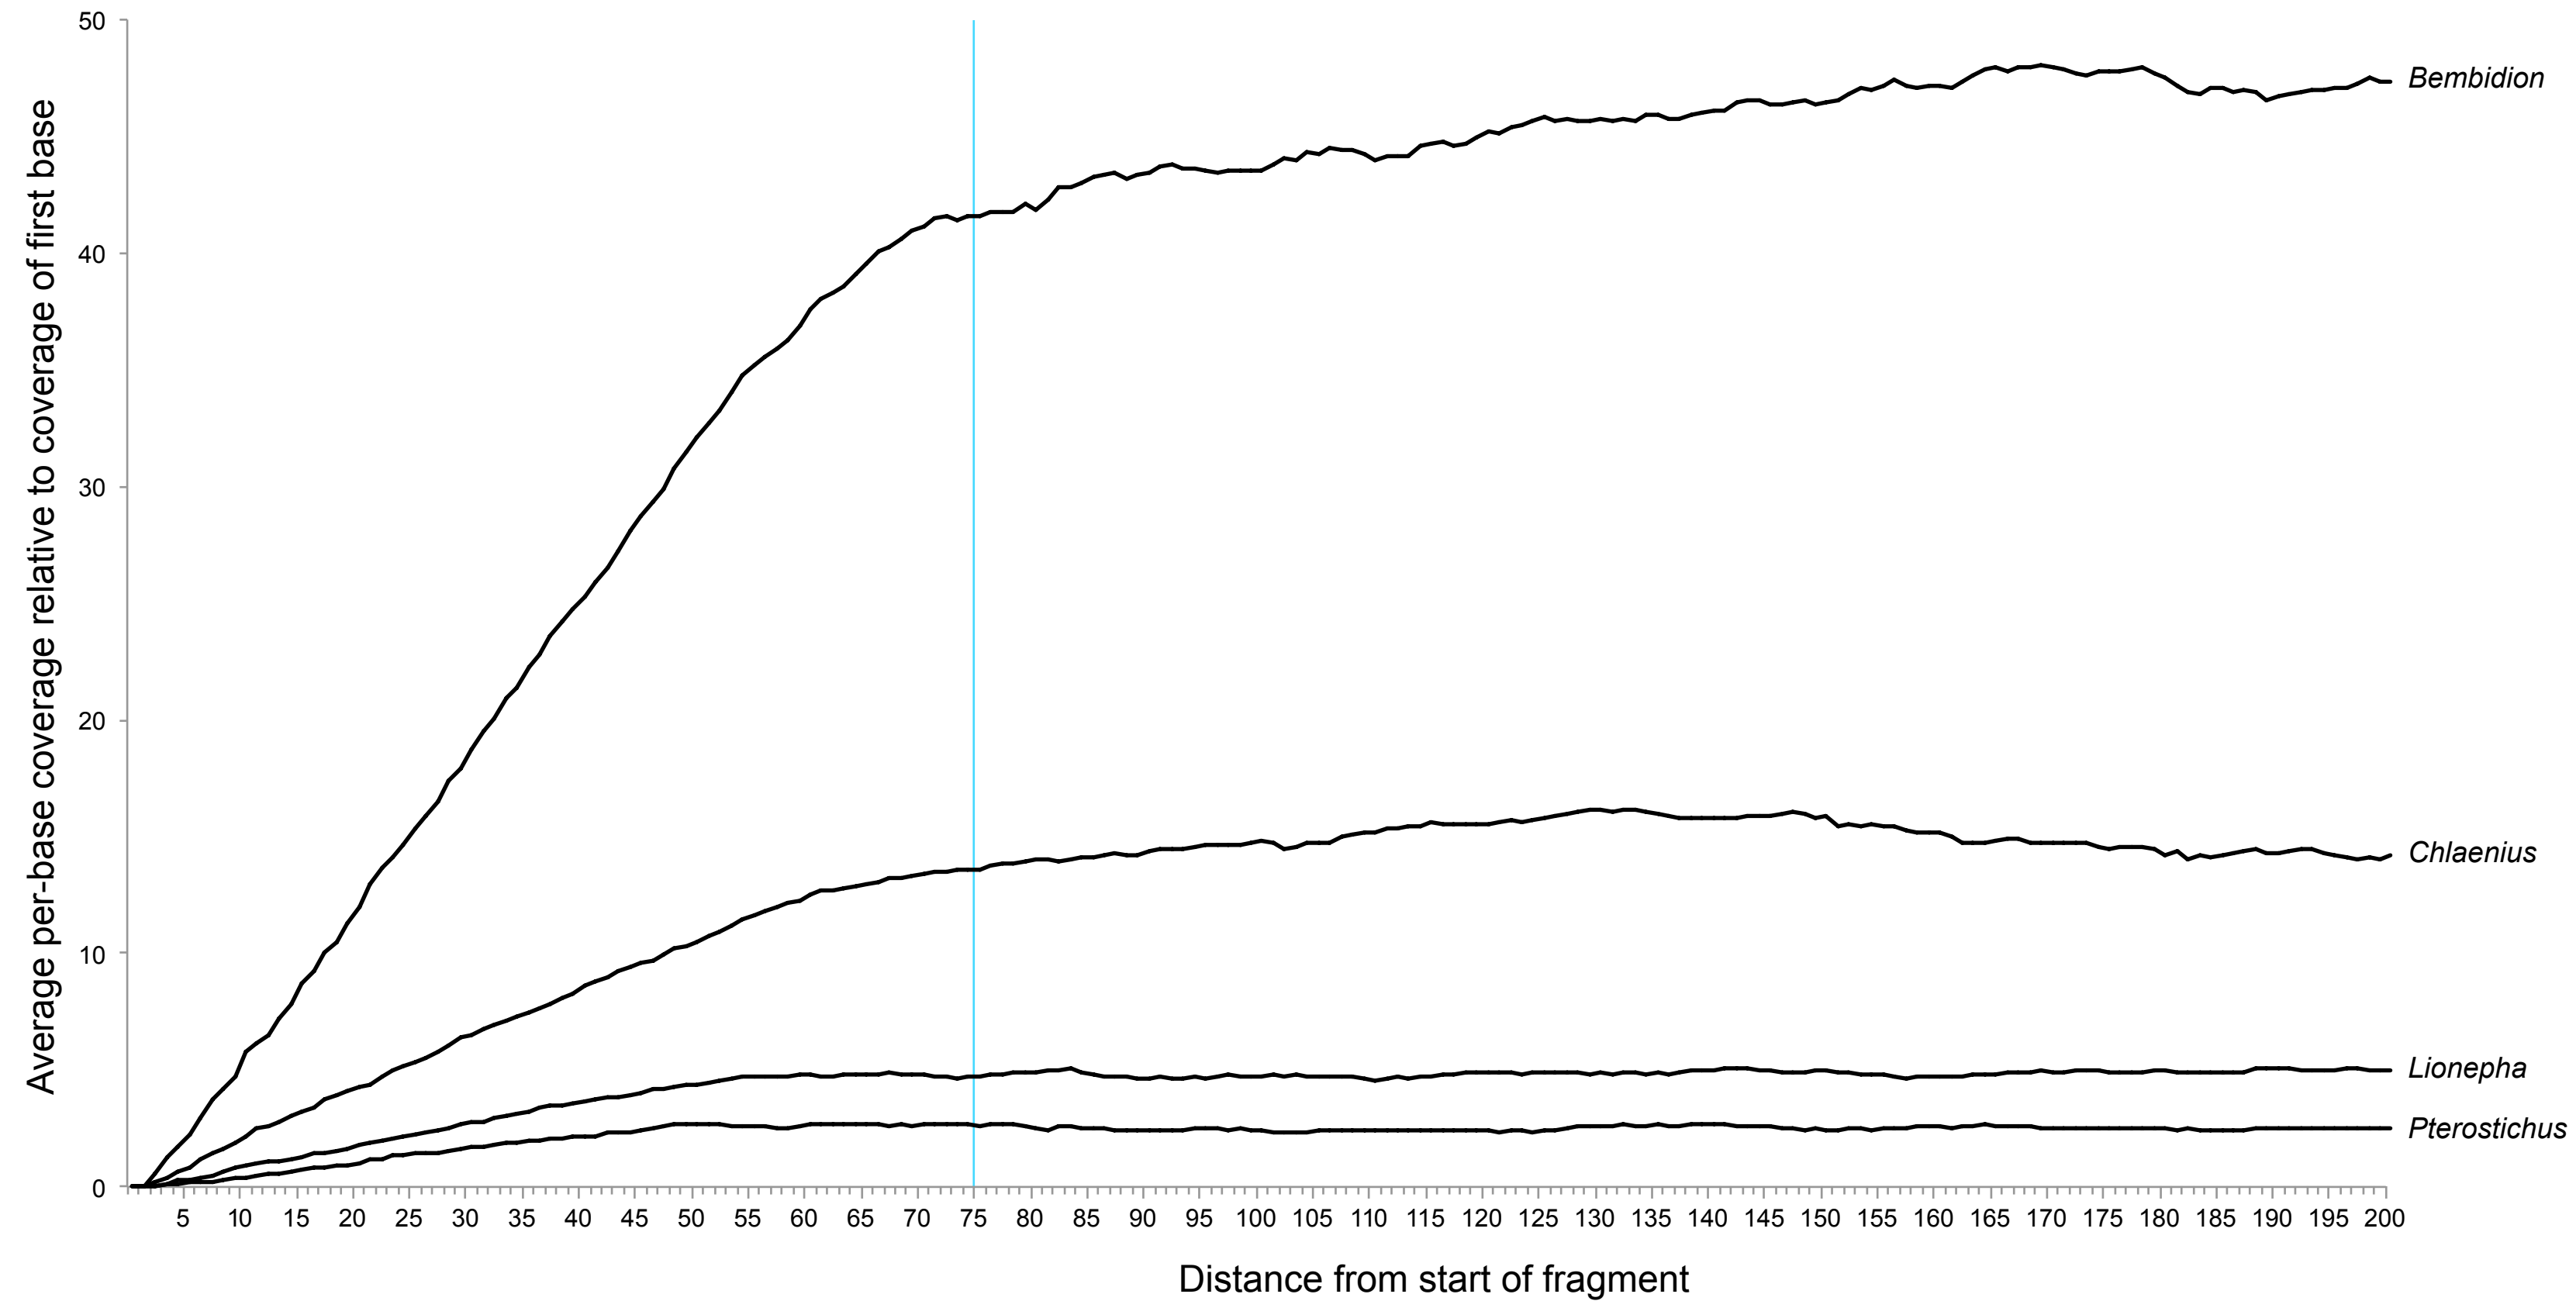

Supplement: Supplementary file 1 [file 1]

**A**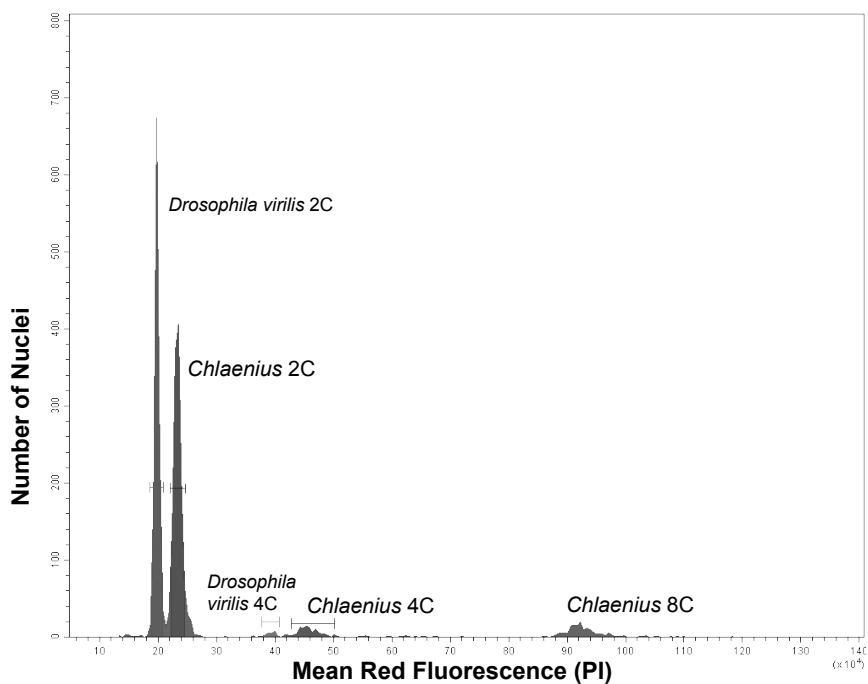**B**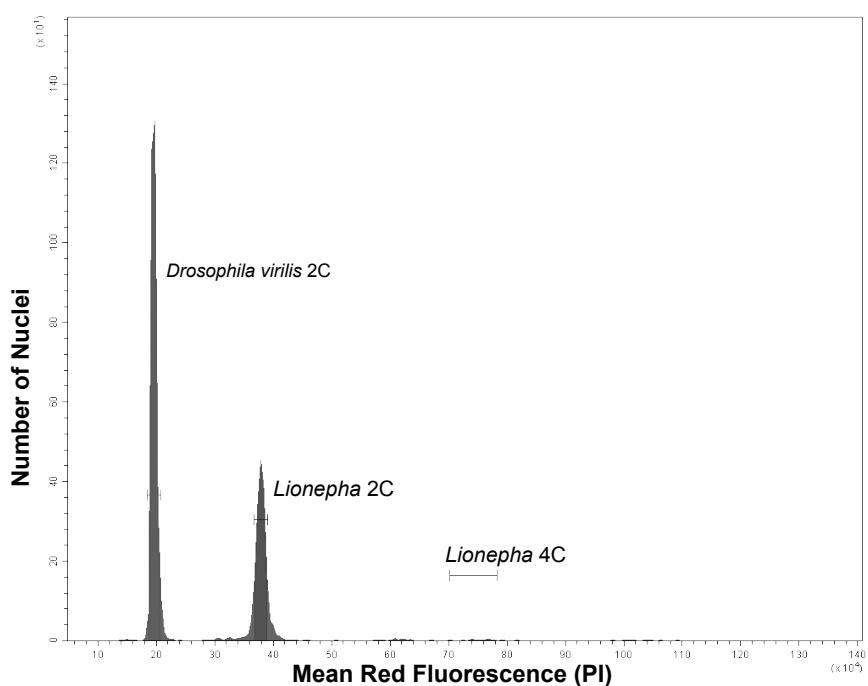**C**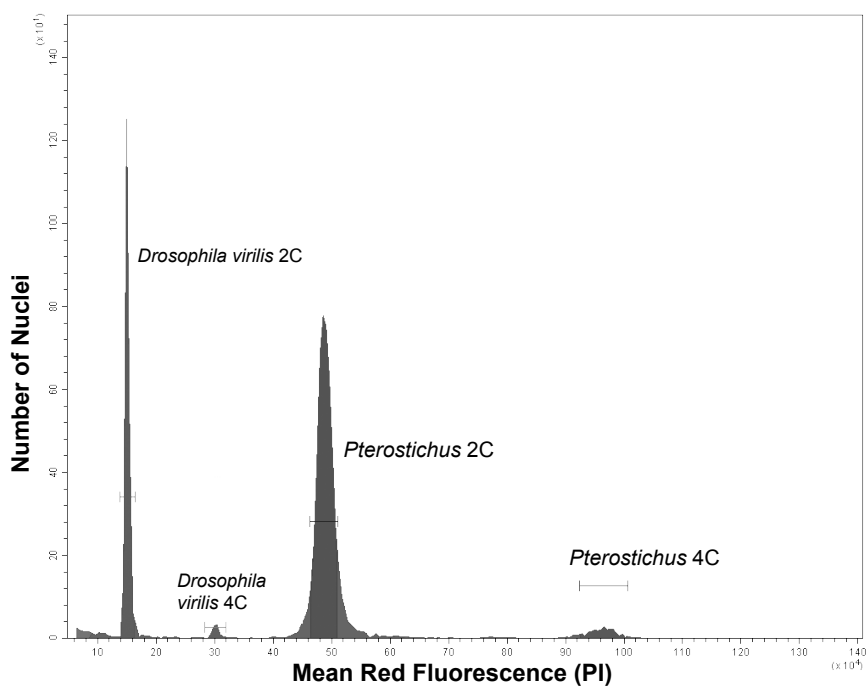

Supplement: Supplementary file 2 [file 1]

# *Chlaenius sericeus* Genome Size Estimates at different values of k

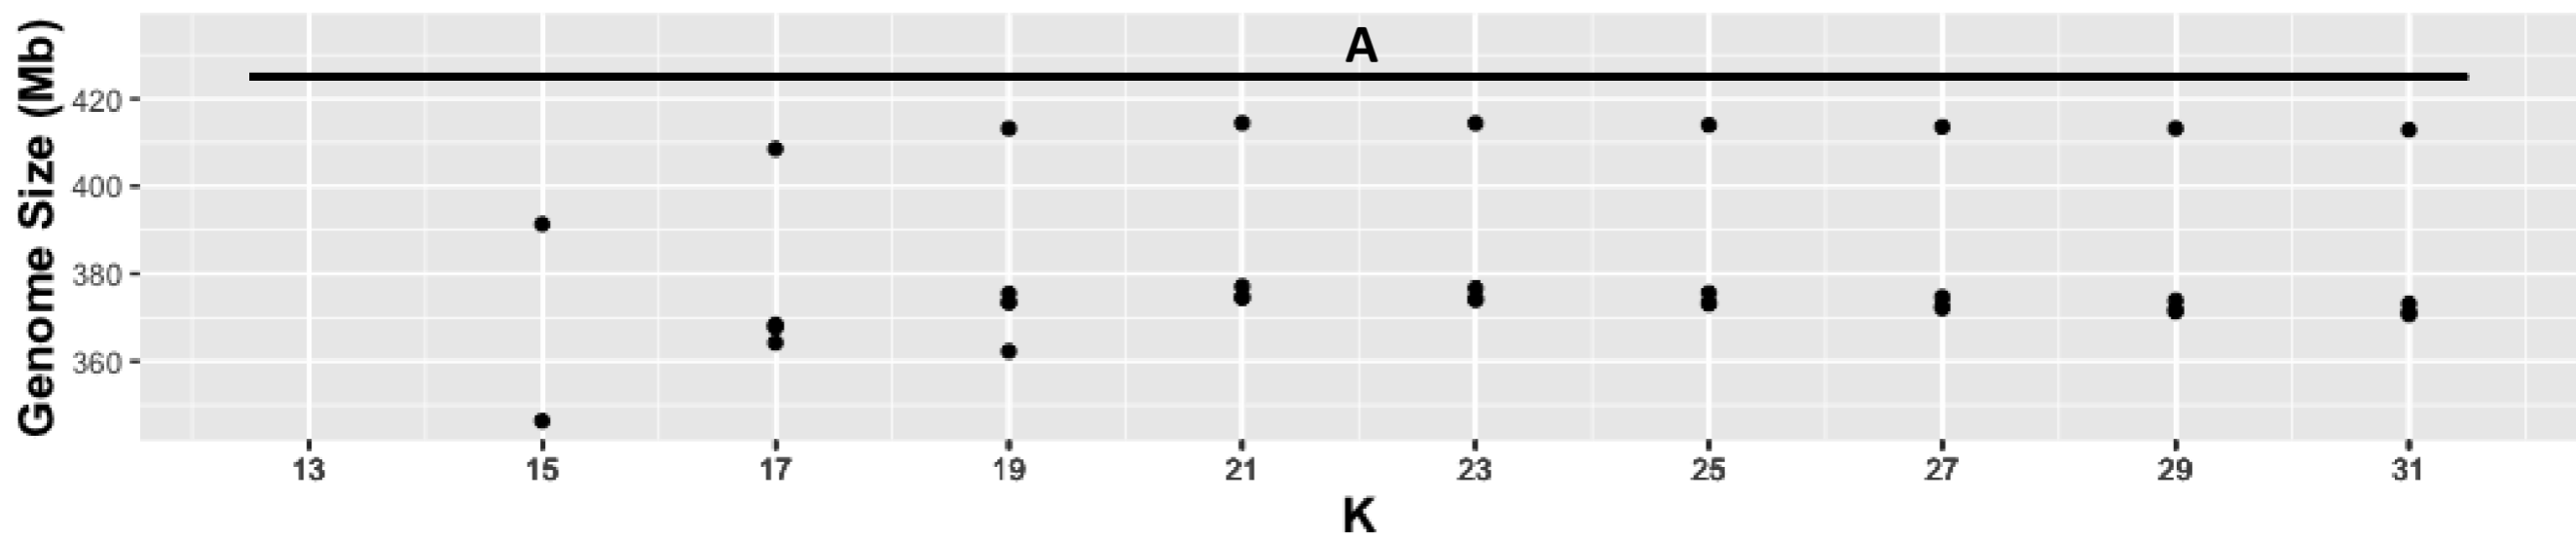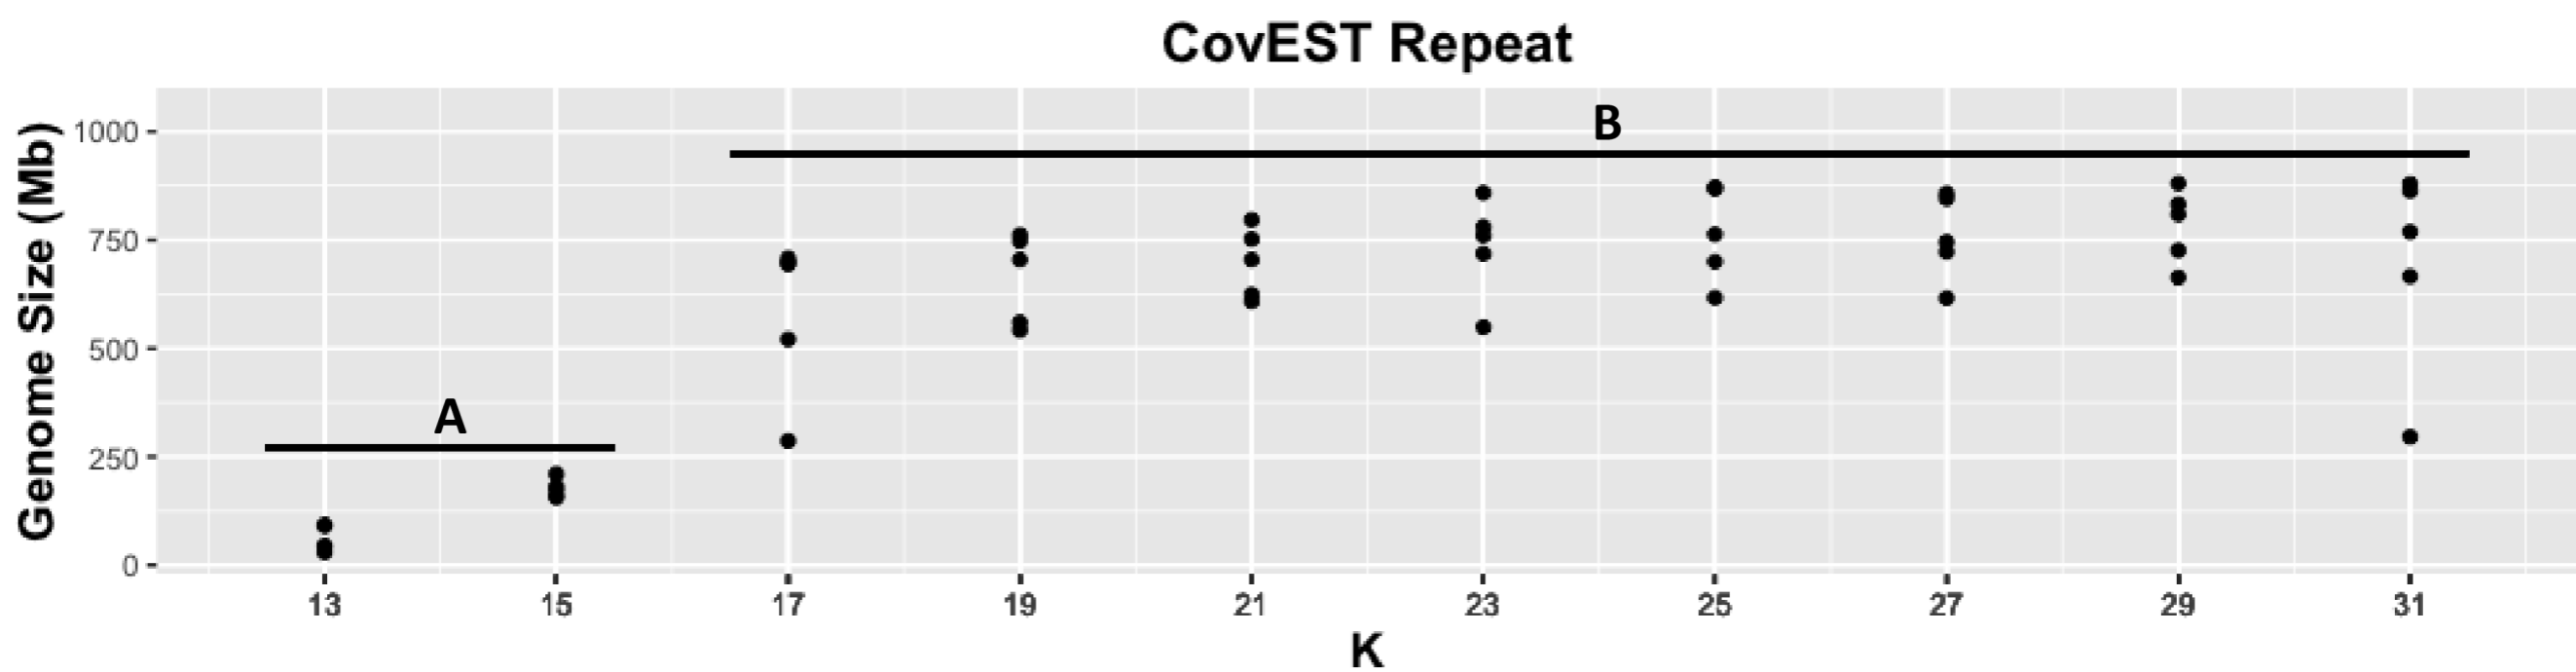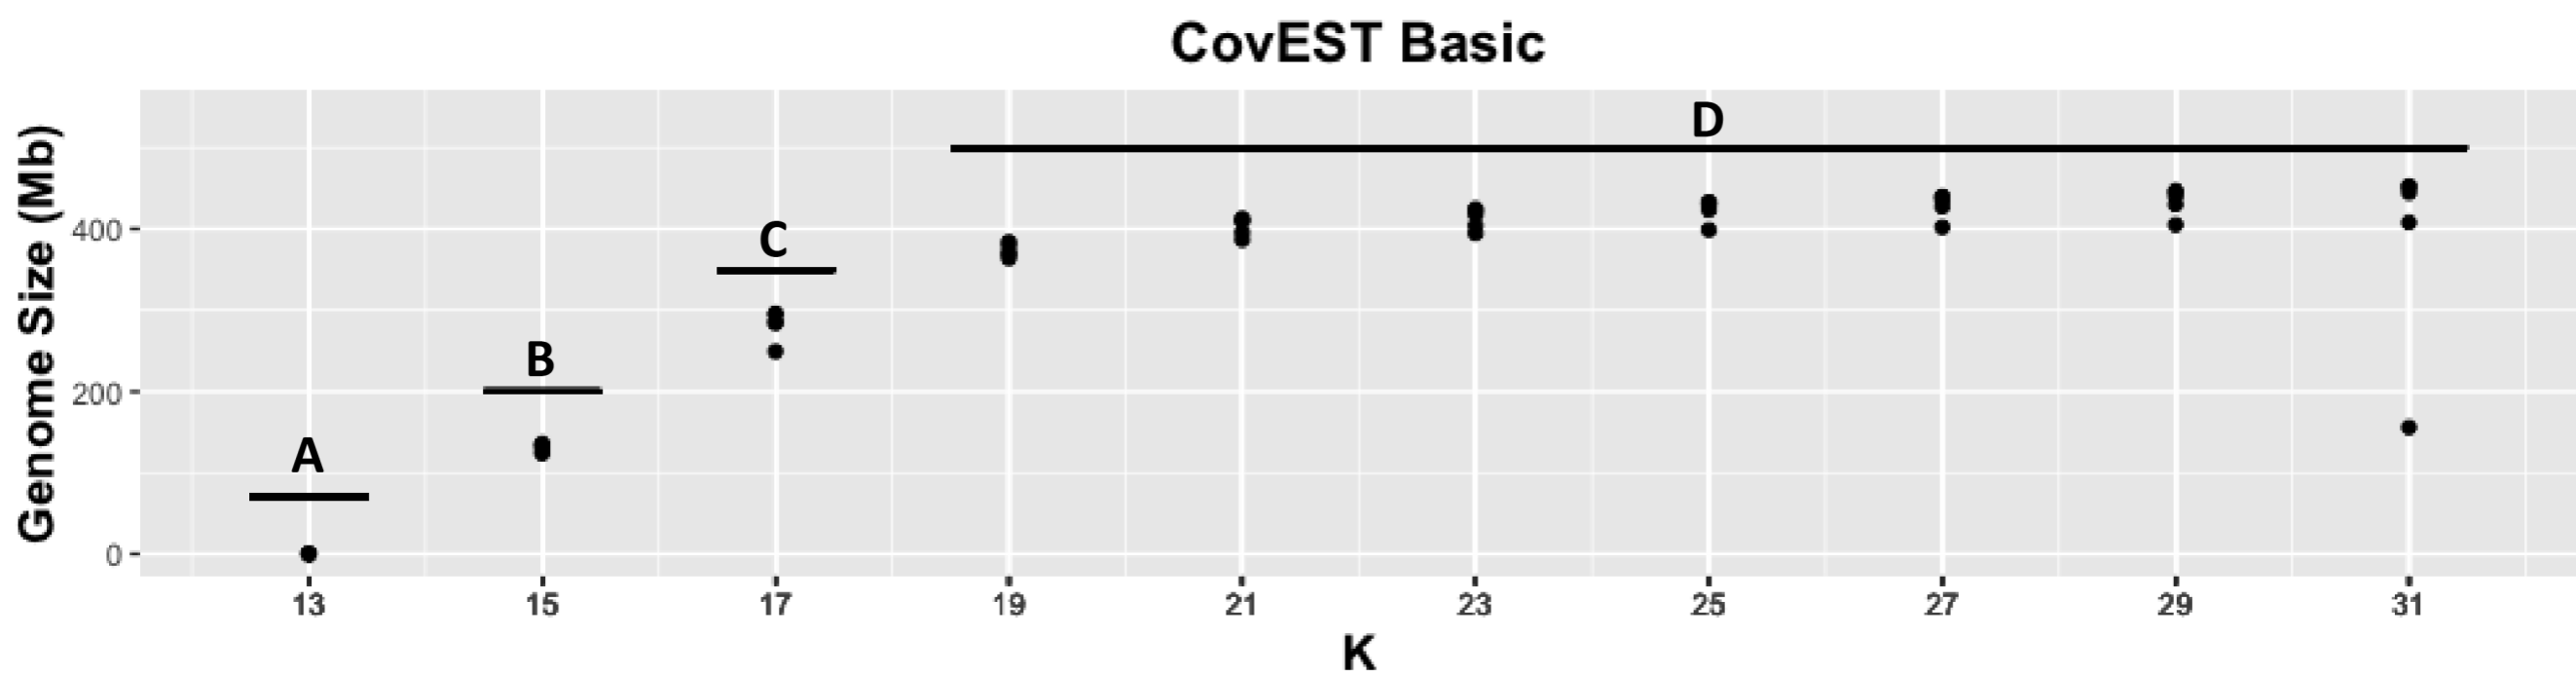

Supplement: Supplementary file 3 [file 1]

# *Pterostichus melanarius* Genome Size Estimates at different values of k

## CovEST Repeat

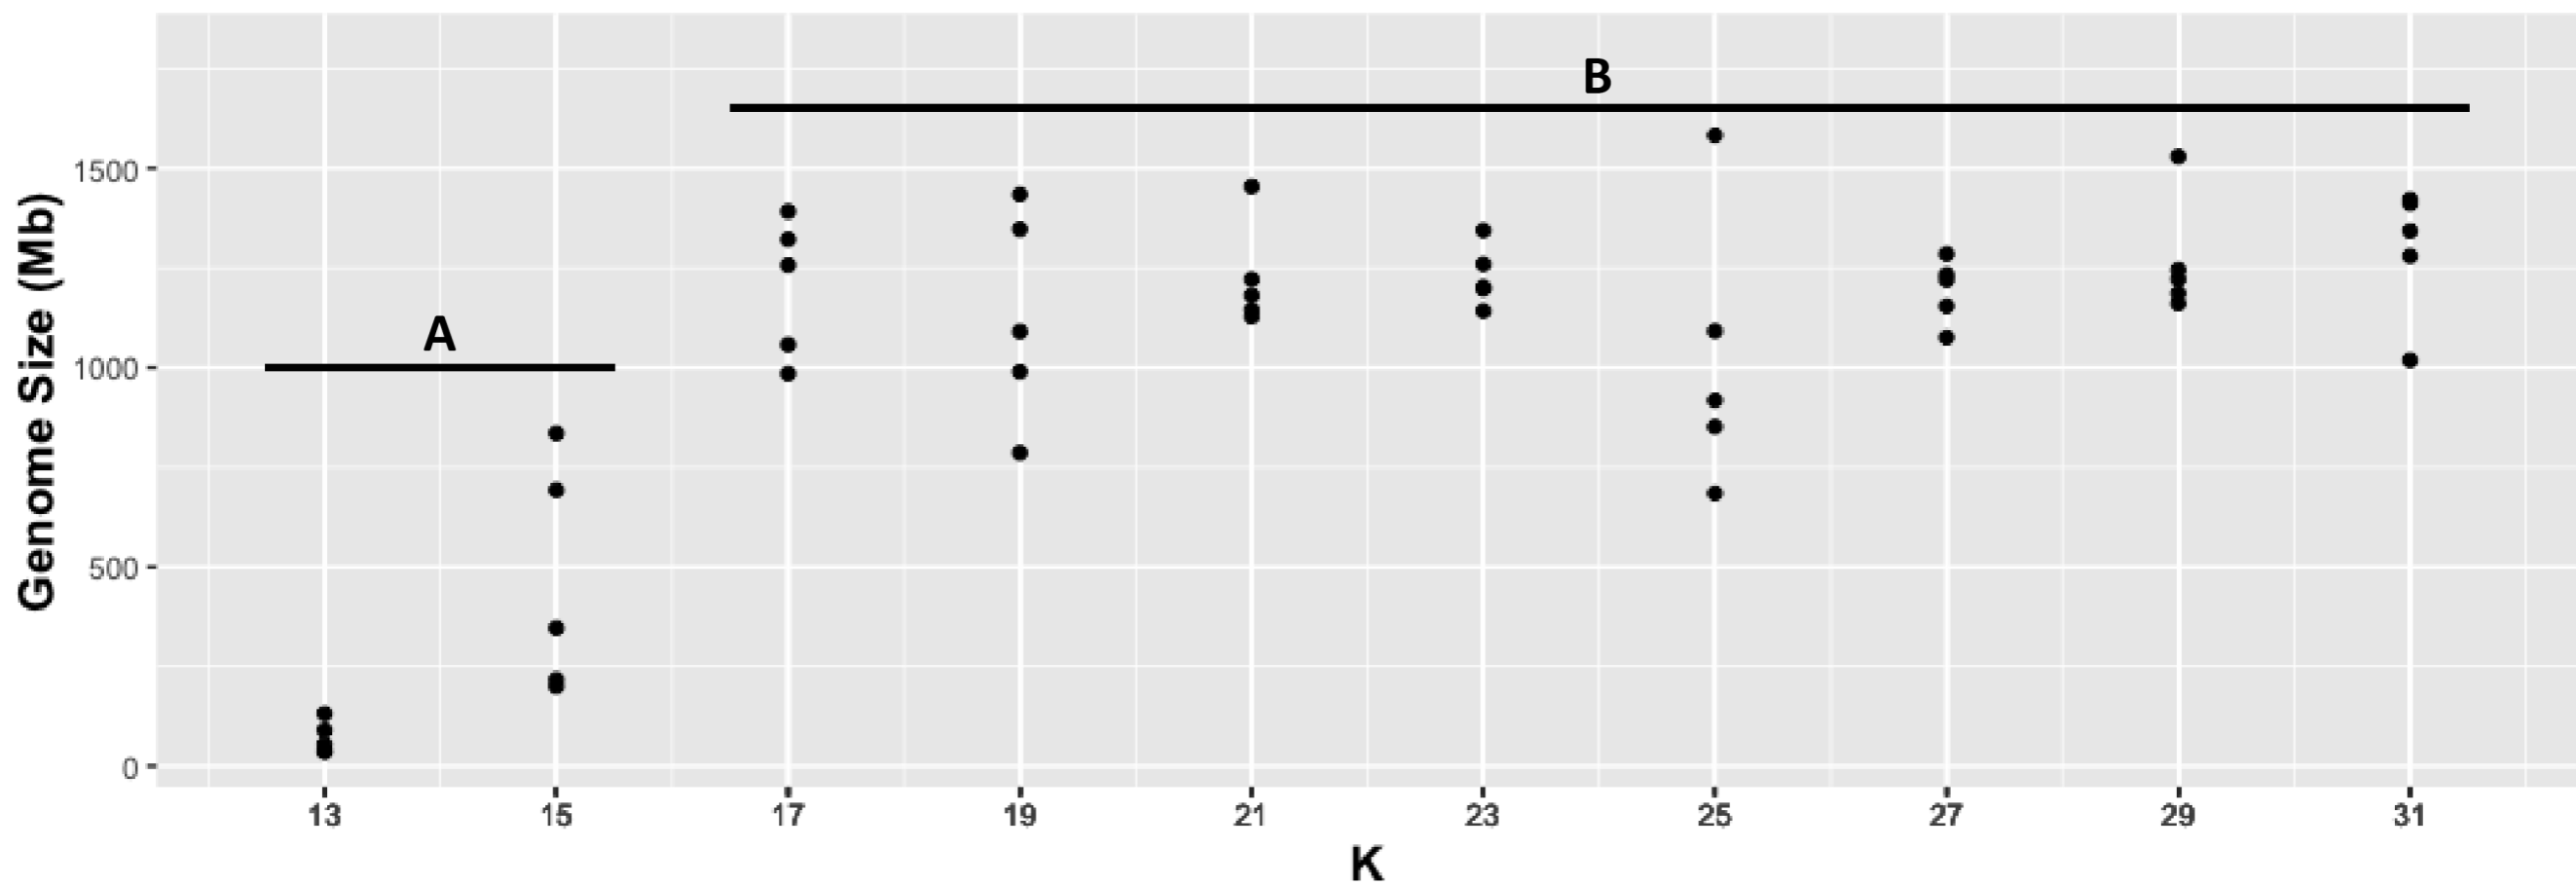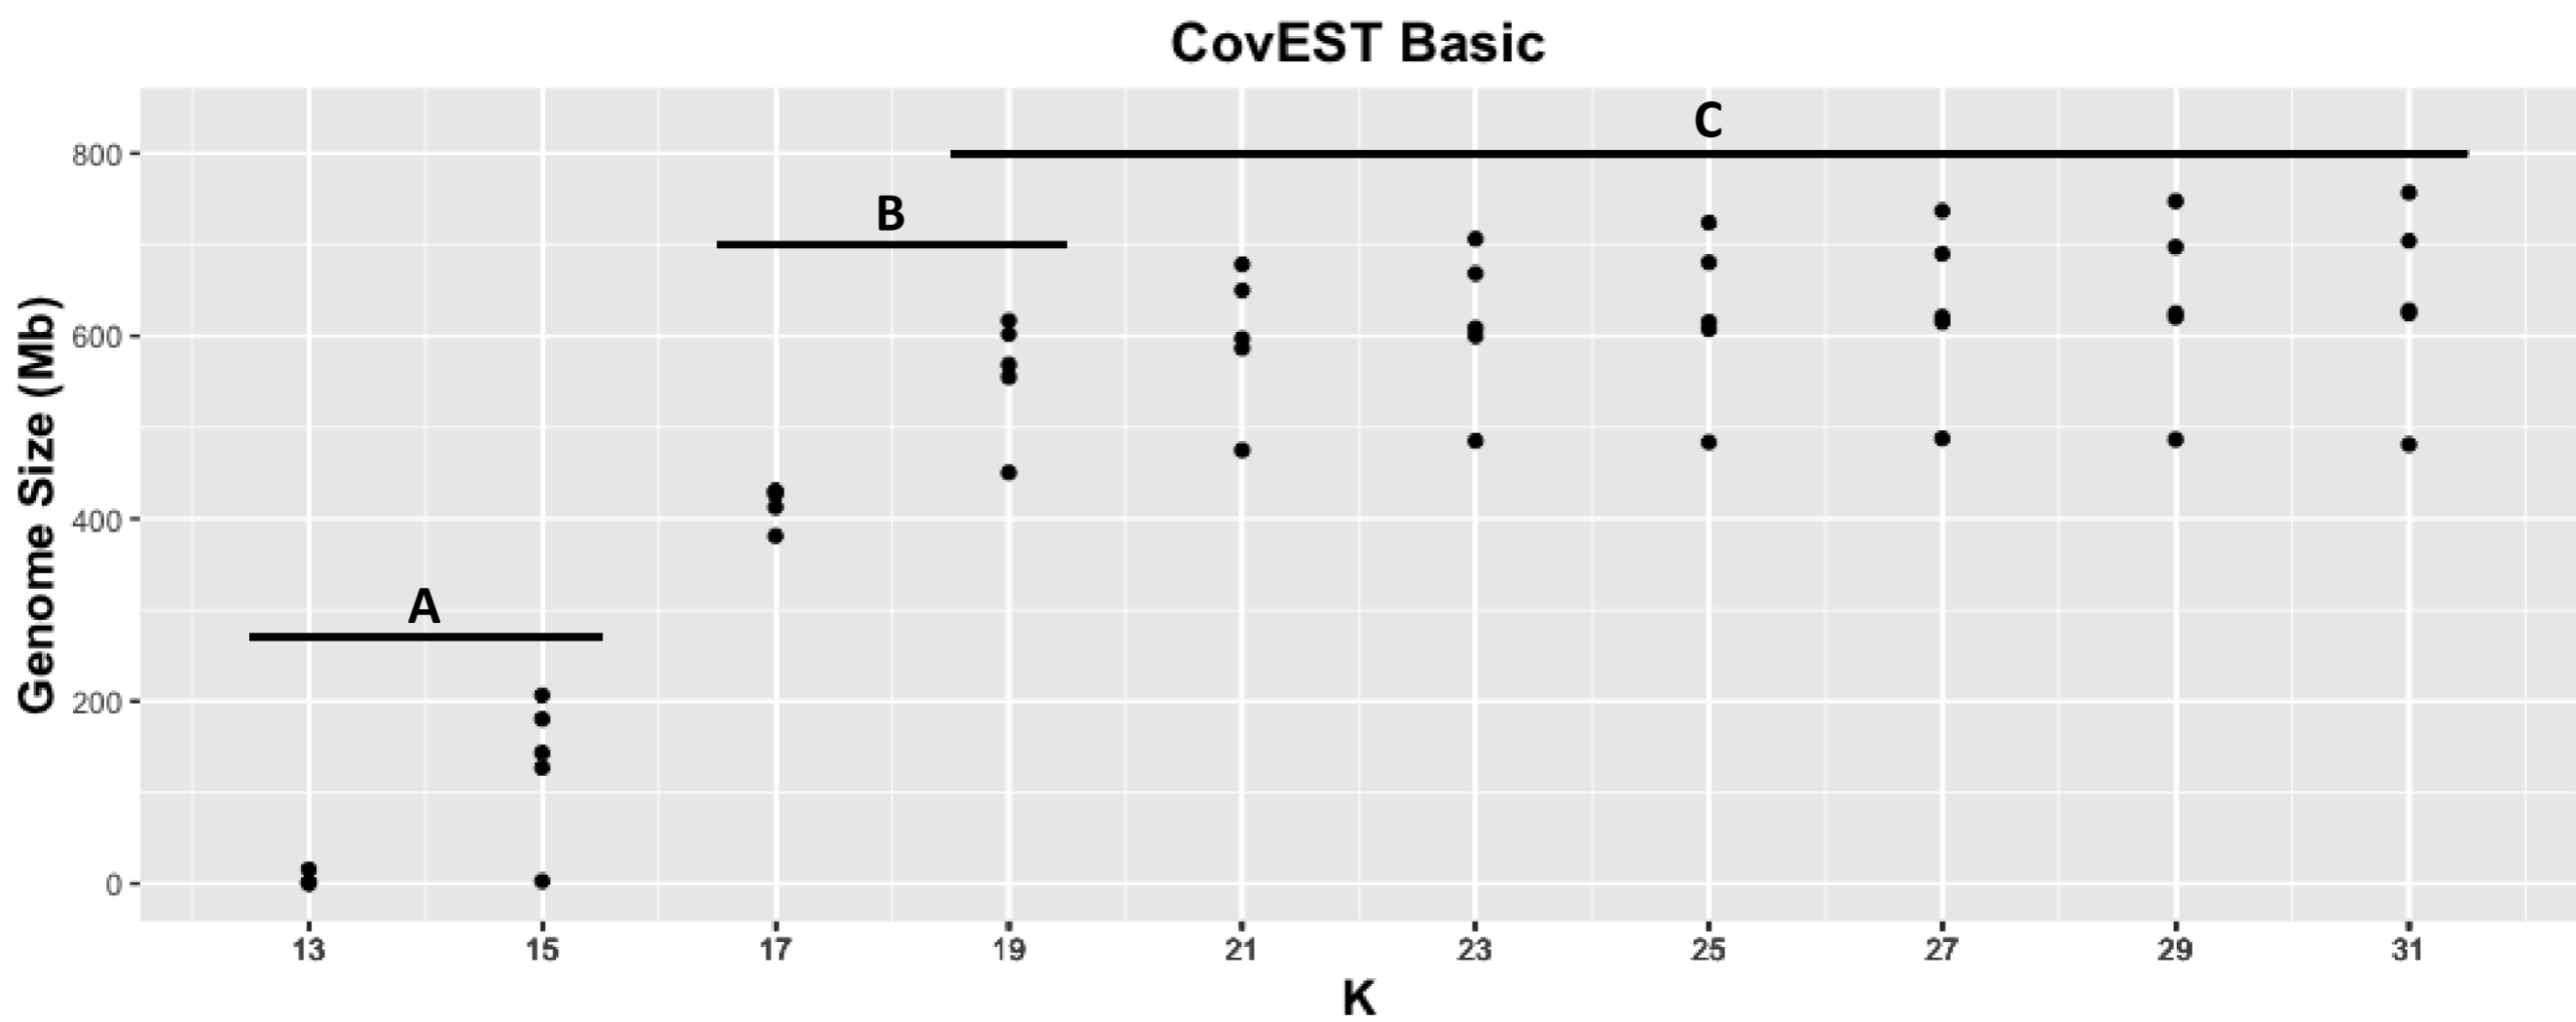

Supplement: Supplementary file 4 [file 1]

# *Lionepha tuulukwa* Genome Size Estimates at different values of k

## GenomeScope

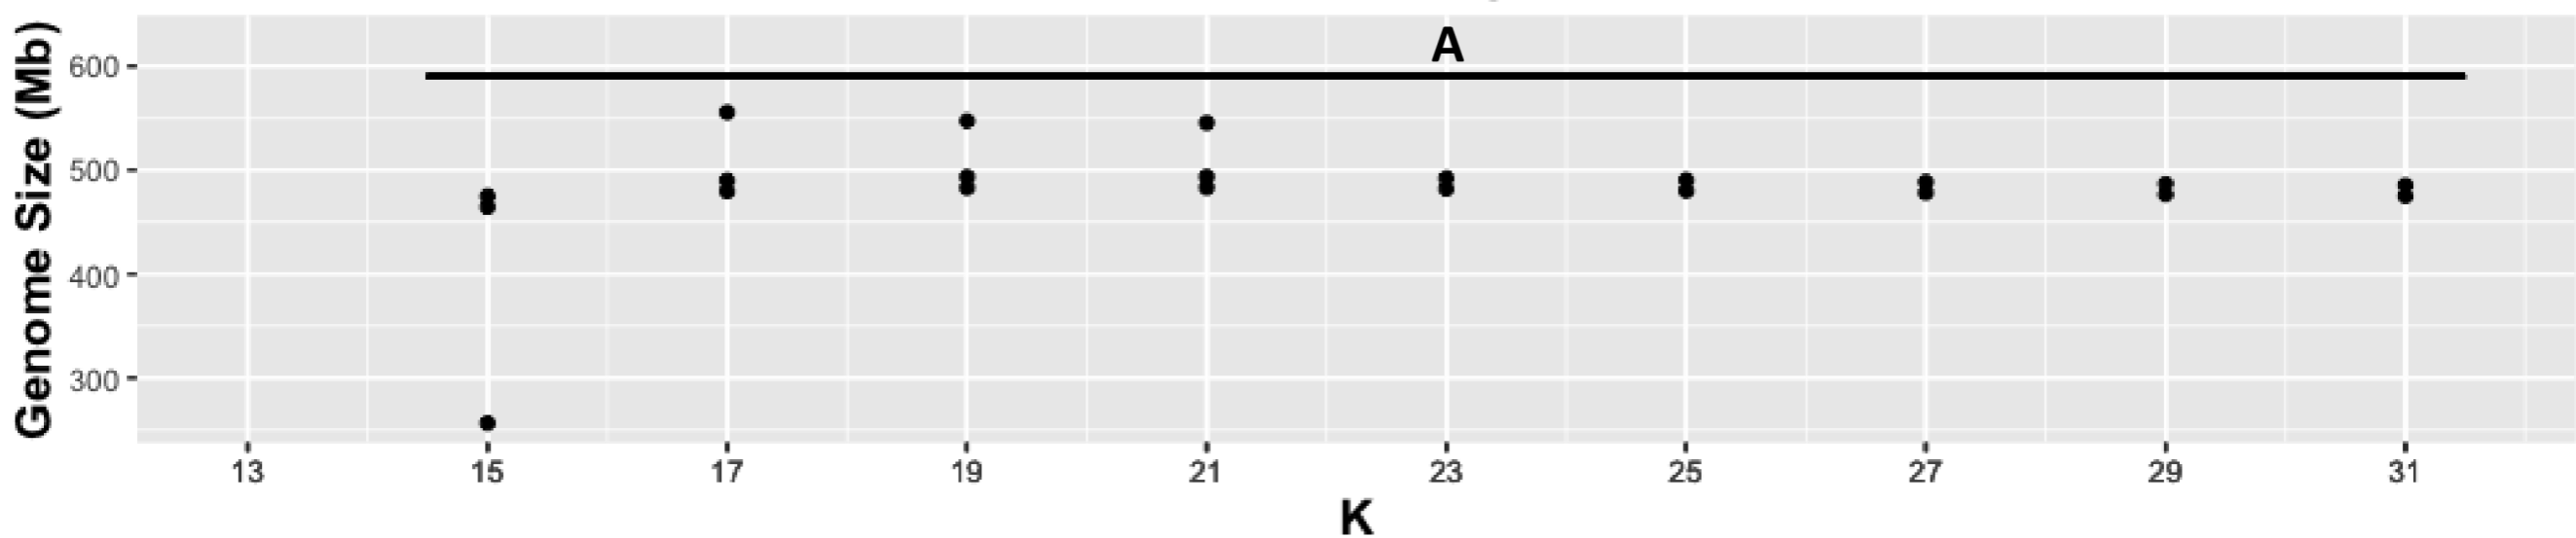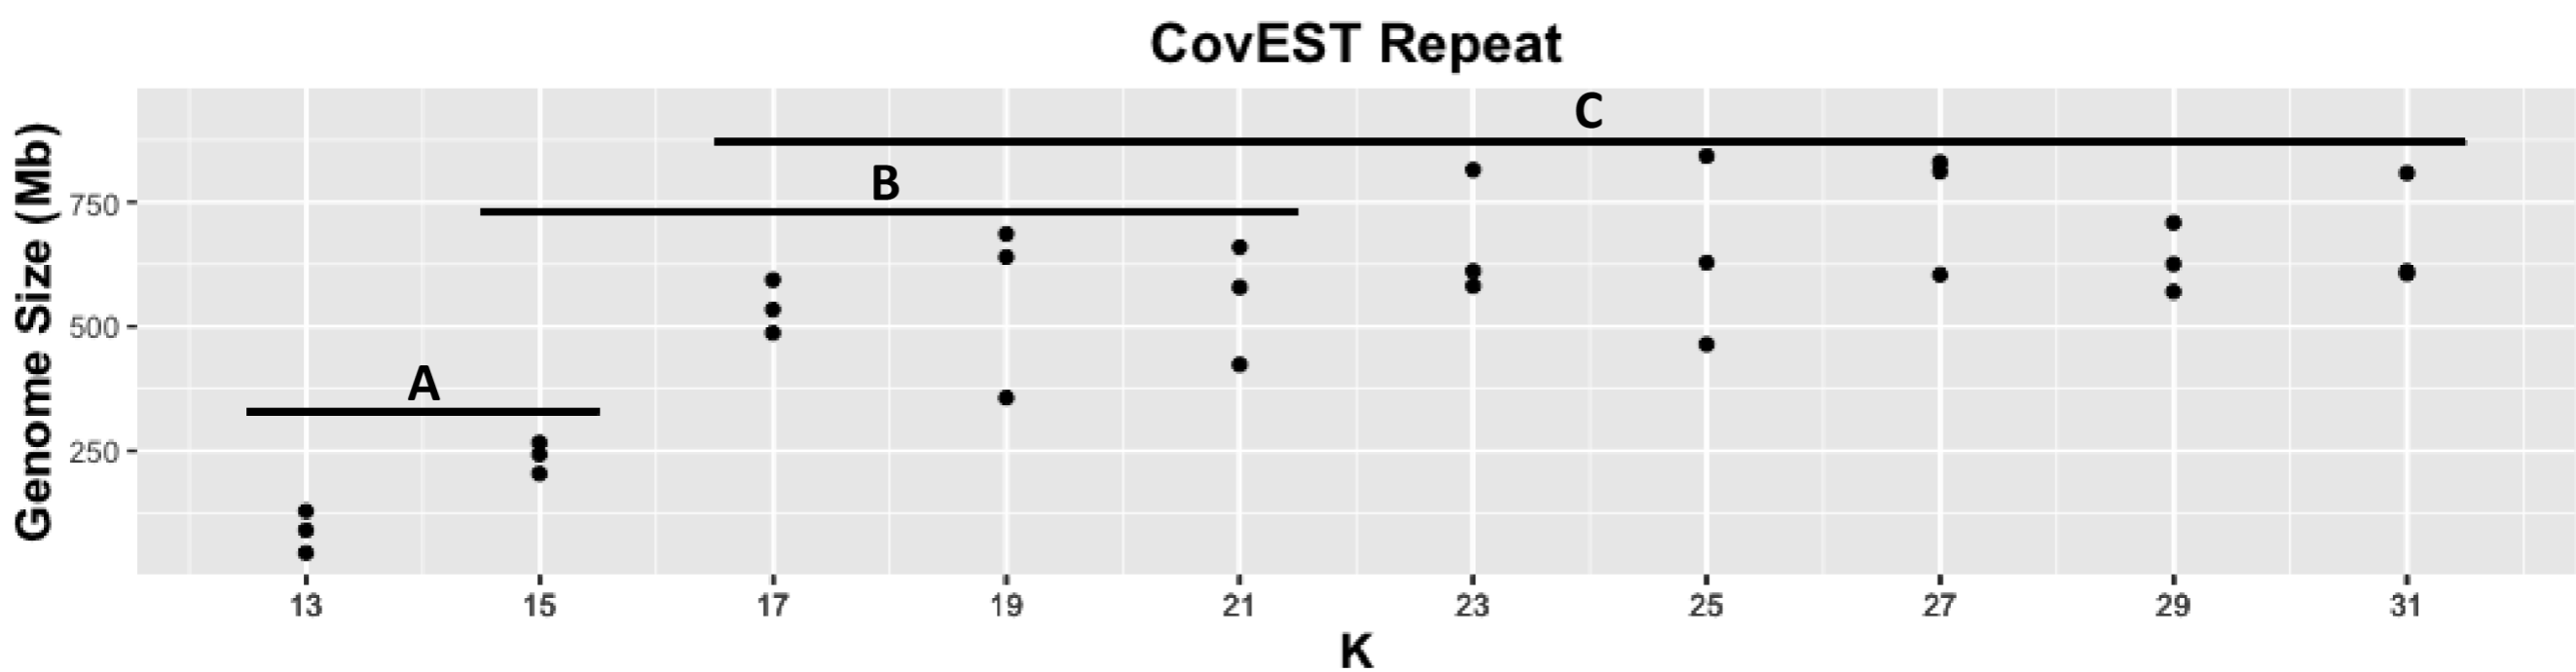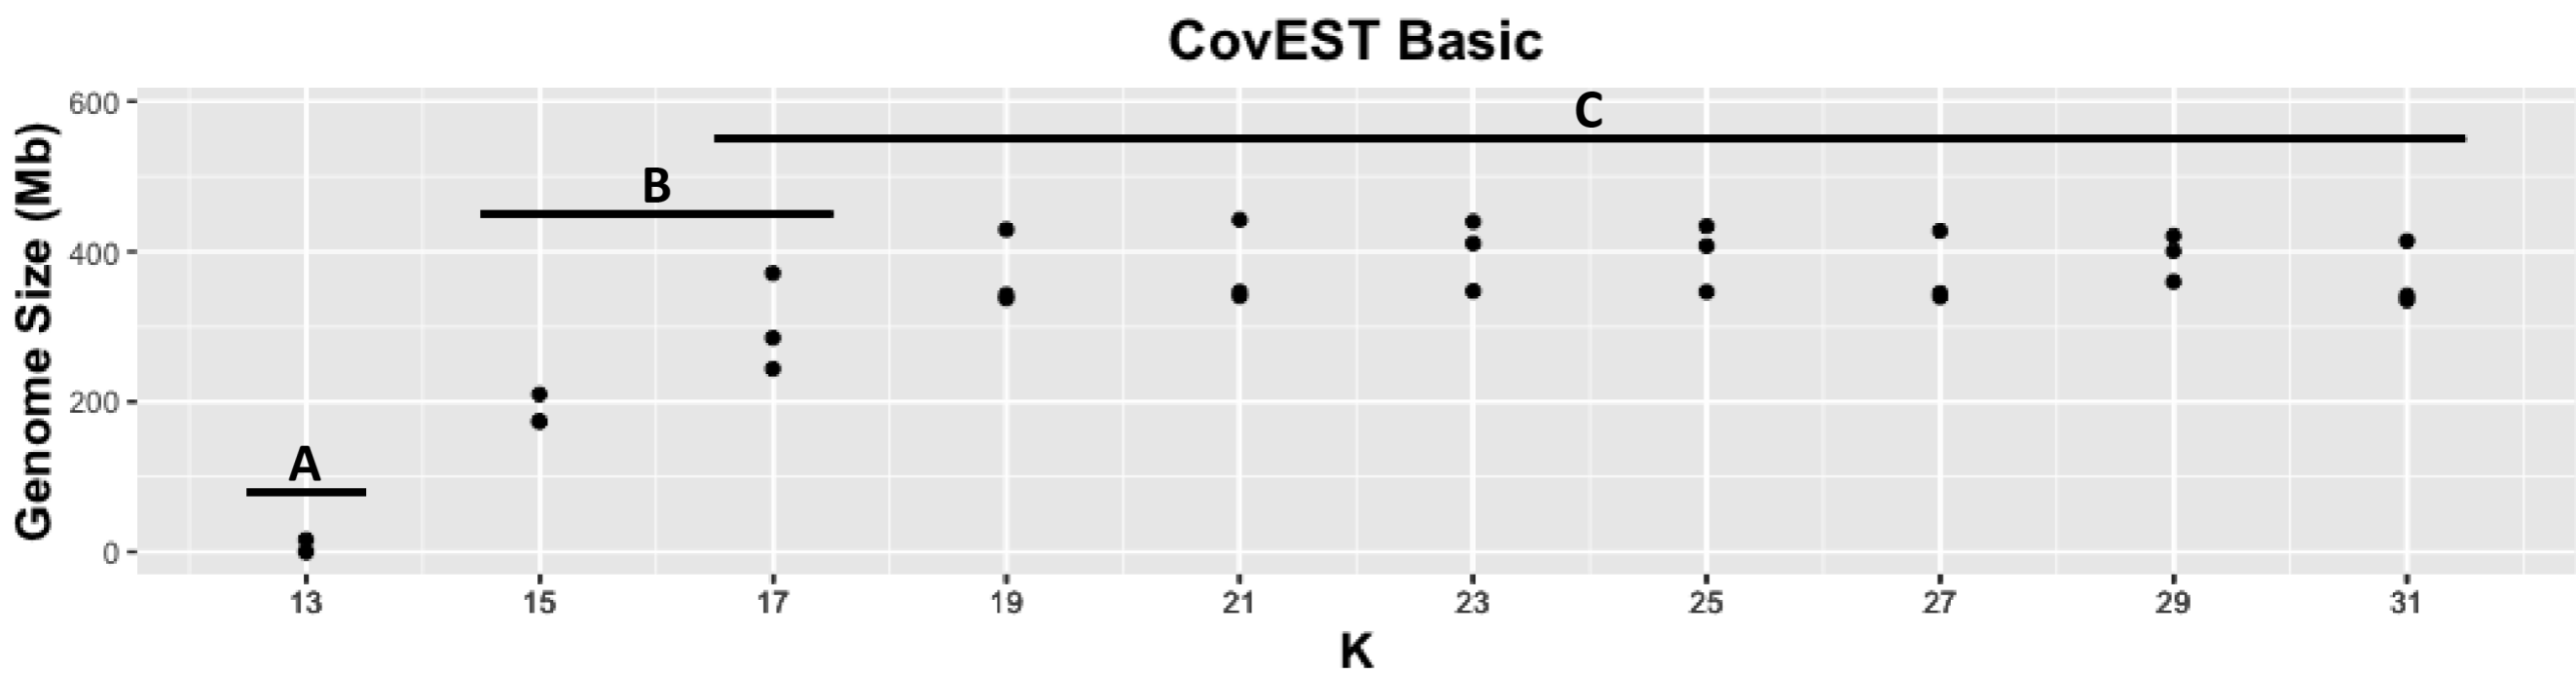

Supplement: Supplementary file 6 [file 1]

# *Bembidion* sp. nr. *transversale* Genome Size Estimates at different values of k

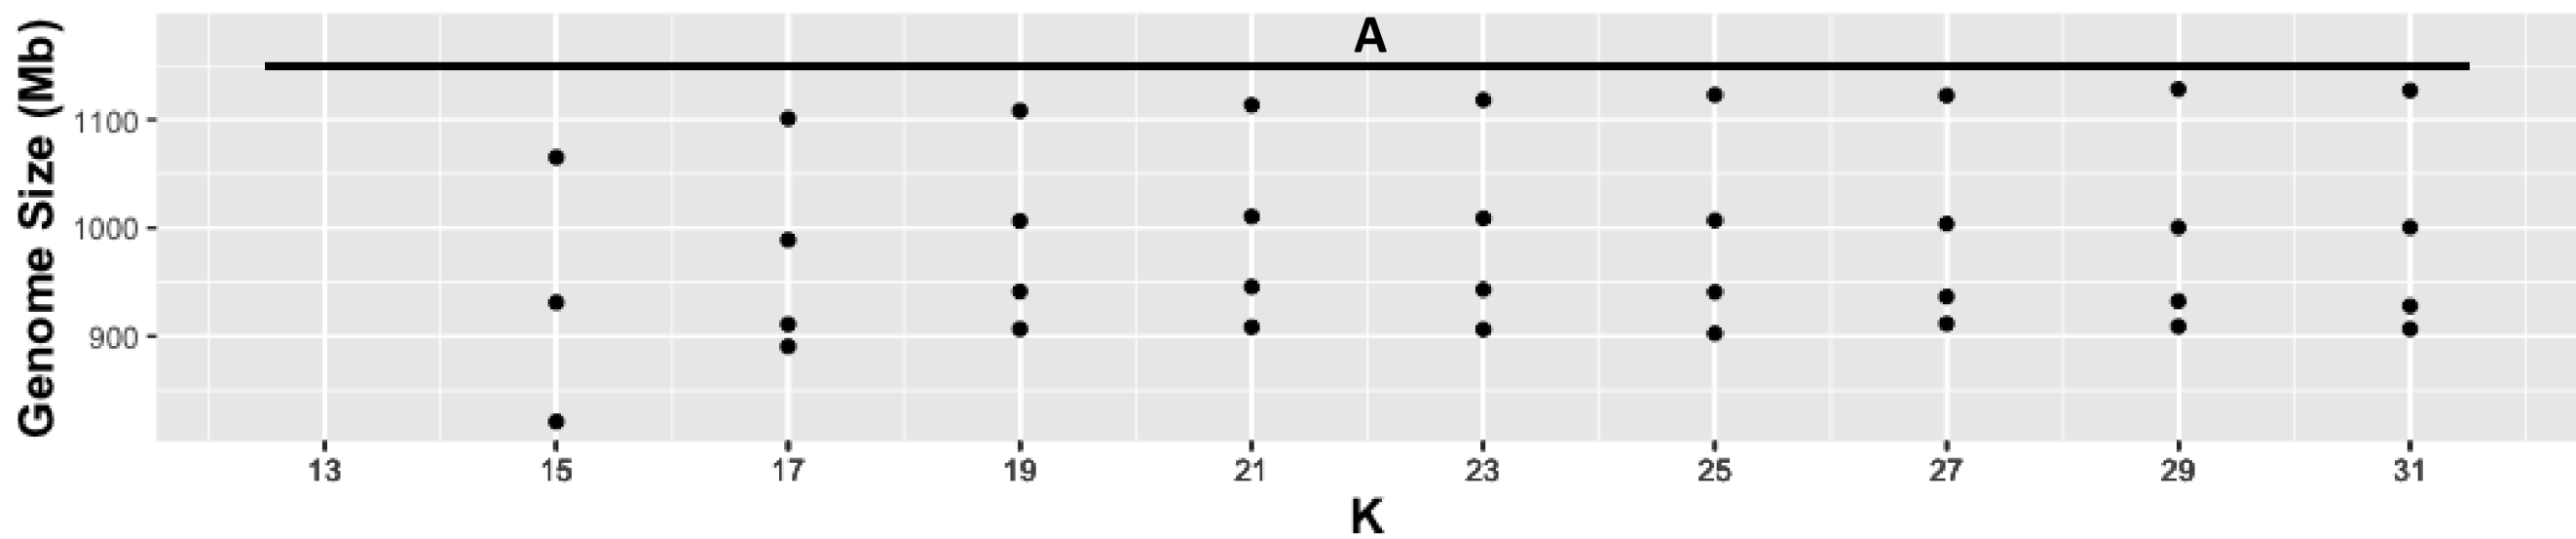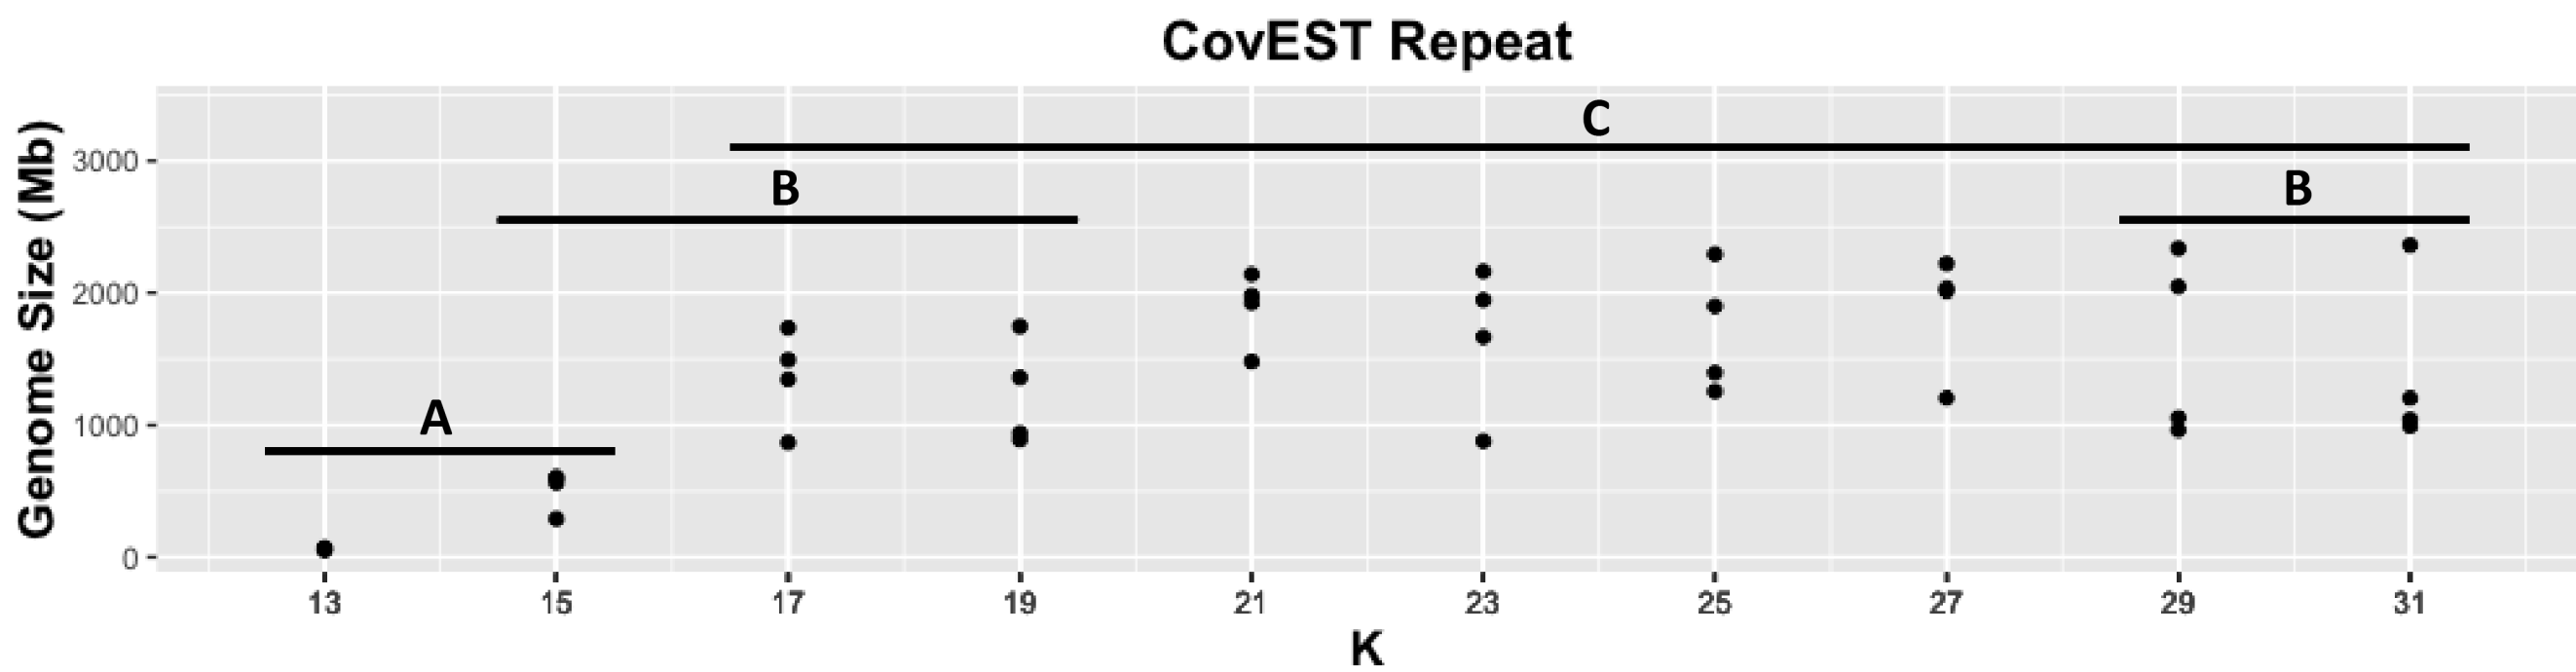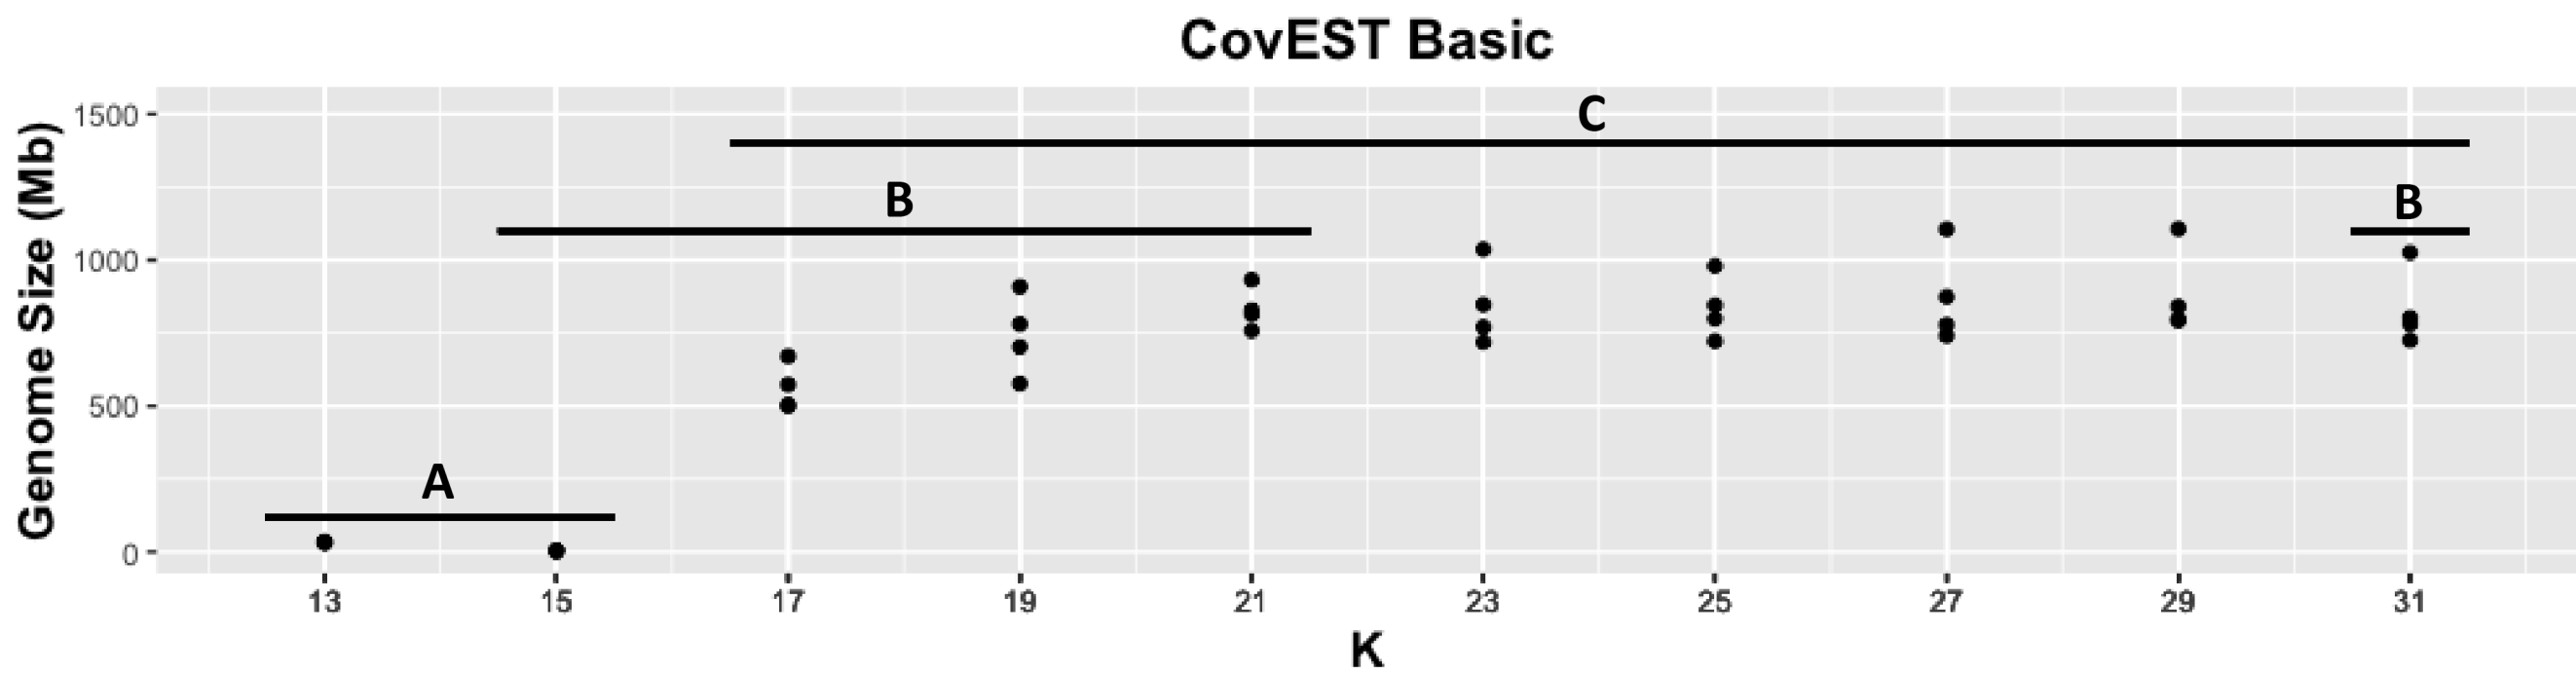

Supplement: Supplementary file 7 [file 1]
